# Supplementary material
Source: HighWire-hosted journal article supplement (http://www.qdcxjkg.com/highwire/filestream/113897/field_highwire_adjunct_files/0/ERJ-01401-2012_Disclosures.pdf)
Supplement: ERJ-01401-2012_Disclosures.pdf [file ERJ-01401-2012_Disclosures.pdf]

**T. Pulido's** institution has received research grants from Actelion Pharmaceuticals. T. Pulido has been member of scientific committees and has received speaking fees and serves as consultant for Actelion Pharmaceuticals.

**R.J. Barst** has received support from the sponsor of pediatric pulmonary hypertension (PePH), Actelion, for serving on the Executive Board of TOPP.
